# Supplementary material
Source: Research Square preprint supplement (doi:10.21203/rs.3.rs-10222474/v1)

*Supplemental Figure 1: NICU Social Work Intake Assessment Template*

**NICU Initial Social Work Assessment**

Name:            MRN:            DOB:

**Admission date:**

Information provided by and/or verified with:

**Subjective/Objective:**

Assessment Type: Initial

Primary Family Member #1:

Full Name:

Age:

Resides with Patient?:

Primary Family Member #2:

Full Name:

Resides with Patient?:

Primary Family Member #3:

Full Name:

Age:

Resides with Patient?:

Who is patient's legal guardian?:

Who can consent to treat?:

Primary Caregivers:

Primary Caregivers Relationship:

Biological Mother's name:

Biological Mother's age:

Patient's Parents/Guardians' Status:

Support Systems:

Community Resources/Agencies Involved:

Spiritual/Cultural/Ethnic Needs/Special Preferences:

Educational Concerns/Worries:

Form of Transportation:

Current Healthcare Coverage:

Other Financial Resources:

Who Provides Childcare?:

Family Stressors:

Safety in Home:

Adjustment to Illness:

Barriers to Treatment:

In Case of Emergency:

Patient/family concerns?

Birth Hospital:  
Prenatal Care:  
Gestation:  
Apgars:  
Birthweight:  
Gravida  
Para:  
Living:

Diagnosis:

Lodging Needs:  
Meal Card Discussed:  
Safe Sleep:  
Car Seat:  
Drug/Alcohol/Tox screens:  
Family Safety Assessment:

**NARRATIVE:**

**ASSESSMENT:**

**PLAN:**

- Family to add pt to insurance and/or Medicaid.
- Pt may need an Early Intervention referral before discharge.
- Pt may qualify for Social Security Disability (SSI). SW is available to provide support at the family's request.
- Provided social work contact information and resource packet to family.
- Will follow family until discharge for support and resource assistance as needed.

*Supplemental Table 1: Demographics of patients without a SW intake note*

| <b>Demographic Table for Excluded Families</b> |  | <b>N = 20<sup>1</sup></b> |
|------------------------------------------------|--|---------------------------|
| <b>Race</b>                                    |  |                           |
| White                                          |  | 13 (68%)                  |
| Black                                          |  | 2 (11%)                   |
| Asian                                          |  | 1 (5.3%)                  |
| Native Indian or Native Alaska                 |  | 0 (0%)                    |
| Native Hawaiian or Pacific Islander            |  | 0 (0%)                    |
| Other                                          |  | 3 (16%)                   |
| Unknown                                        |  | 1                         |
| <b>Ethnicity</b>                               |  |                           |
| Hispanic or Latino                             |  | 2 (11%)                   |
| Not Hispanic or Latino                         |  | 17 (89%)                  |
| Unknown                                        |  | 1                         |
| <b>Primary Language</b>                        |  |                           |
| English                                        |  | 16 (80%)                  |
| Spanish                                        |  | 2 (10%)                   |
| Other                                          |  | 2 (10%)                   |
| <b>Primary Insurance Type</b>                  |  |                           |
| Medicaid                                       |  | 9 (50%)                   |
| Private                                        |  | 9 (50%)                   |
| Self Pay                                       |  | 0 (0%)                    |
| Unknown                                        |  | 2                         |
| <b>Gestational Age at Birth (weeks)</b>        |  |                           |
| <24                                            |  | 1 (5.0%)                  |
| 24-28                                          |  | 0 (0%)                    |
| 28-32                                          |  | 3 (15%)                   |
| 32-36                                          |  | 5 (25%)                   |
| >36                                            |  | 11 (55%)                  |
| <b>Birth Weight (kg)</b>                       |  |                           |
| <0.5                                           |  | 0 (0%)                    |
| 0.5-1                                          |  | 1 (5.0%)                  |
| 1-2                                            |  | 5 (25%)                   |
| 2-3                                            |  | 8 (40%)                   |
| 3-4                                            |  | 4 (20%)                   |
| >4                                             |  | 2 (10%)                   |

| <b>Demographic Table for Excluded Families</b>        |  | <b>N = 20<sup>f</sup></b> |
|-------------------------------------------------------|--|---------------------------|
| <b>Length of Stay (days)</b>                          |  |                           |
| <10                                                   |  | 5 (25%)                   |
| 10-20                                                 |  | 10 (50%)                  |
| 20-30                                                 |  | 0 (0%)                    |
| >30                                                   |  | 5 (25%)                   |
| <b>Corrected Gestational Age at Admission (weeks)</b> |  |                           |
| <24                                                   |  | 0 (0%)                    |
| 24-28                                                 |  | 0 (0%)                    |
| 28-32                                                 |  | 2 (11%)                   |
| 32-36                                                 |  | 3 (16%)                   |
| >36                                                   |  | 14 (74%)                  |
| Unknown                                               |  | 1                         |
| <b>Maternal Age (years)</b>                           |  |                           |
| <20                                                   |  | 0 (0%)                    |
| 20-25                                                 |  | 2 (13%)                   |
| 25-30                                                 |  | 4 (27%)                   |
| 30-35                                                 |  | 3 (20%)                   |
| >35                                                   |  | 6 (40%)                   |
| Unknown                                               |  | 5                         |
| <b>Maternal Gravidity</b>                             |  |                           |
| 1                                                     |  | 5 (28%)                   |
| 2                                                     |  | 5 (28%)                   |
| 3                                                     |  | 2 (11%)                   |
| 4                                                     |  | 4 (22%)                   |
| 5                                                     |  | 1 (5.6%)                  |
| 6+                                                    |  | 1 (5.6%)                  |
| Unknown                                               |  | 2                         |
| <b>Maternal Parity</b>                                |  |                           |
| 0                                                     |  | 0 (0%)                    |
| 1                                                     |  | 8 (44%)                   |
| 2                                                     |  | 3 (17%)                   |
| 3                                                     |  | 3 (17%)                   |
| 4                                                     |  | 3 (17%)                   |
| 5                                                     |  | 1 (5.6%)                  |
| 6+                                                    |  | 0 (0%)                    |

| <b>Demographic Table for Excluded Families</b> | <b>N = 20<sup>1</sup></b> |
|------------------------------------------------|---------------------------|
| Unknown                                        | 2                         |

<sup>1</sup>n (%)

*Supplemental Table 2: NICU Social Work Intake by HRSN Domain*

| Intervention Step      | Frequency n (%) |
|------------------------|-----------------|
| <b>Benefits</b>        |                 |
| Documented             | 189 (74.4%)     |
| Identified             | 76 (40.2%)      |
| Referred               | 73 (96.1%)      |
| <b>Food Insecurity</b> |                 |
| Documented             | 65 (25.6%)      |
| Identified             | 26 (40.0%)      |
| Referred               | 22 (84.6%)      |
| <b>Health Literacy</b> |                 |
| Documented             | 11 (4.3%)       |
| Identified             | 2 (18.2%)       |
| Referred               | 1 (50.0%)       |
| <b>Housing</b>         |                 |
| Documented             | 251 (98.8%)     |
| Identified             | 57 (22.7%)      |
| Referred               | 49 (86.0%)      |
| <b>Mental Health</b>   |                 |
| Documented             | 232 (91.3%)     |
| Identified             | 57 (24.6%)      |
| Referred               | 56 (98.2%)      |
| <b>Transportation</b>  |                 |
| Documented             | 248 (97.6%)     |
| Identified             | 21 (8.5%)       |
| Referred               | 18 (85.7%)      |

*Supplemental Table 3: Total Needs Identified, N = 254*

n (%)

| Benefits/Insurance |             |
|--------------------|-------------|
| Need Identified    | 76 (29.5%)  |
| No Need            | 118 (46.5%) |
| Not Documented     | 61 (24.0%)  |
| Food Insecurity    |             |
| Need Identified    | 26 (10.2%)  |
| No Need            | 41 (16.1%)  |
| Not Documented     | 187 (73.6%) |
| Health Literacy    |             |
| Need Identified    | 2 (0.8%)    |
| No Need            | 9 (3.5%)    |
| Not Documented     | 243 (95.7%) |
| Housing            |             |
| Need Identified    | 57 (22.4%)  |
| No Need            | 194 (76.4%) |
| Not Documented     | 2 (0.8%)    |
| Mental Health      |             |
| Need Identified    | 57 (22.4%)  |
| No Need            | 174 (68.5%) |
| Not Documented     | 23 (9.1%)   |
| Transportation     |             |
| Need Identified    | 21 (8.7%)   |
| No Need            | 226 (89.0%) |
| Not Documented     | 6 (2.4%)    |

Supplemental Figure 2: Distribution of Screening Documentation Outcomes across HRSN Domains

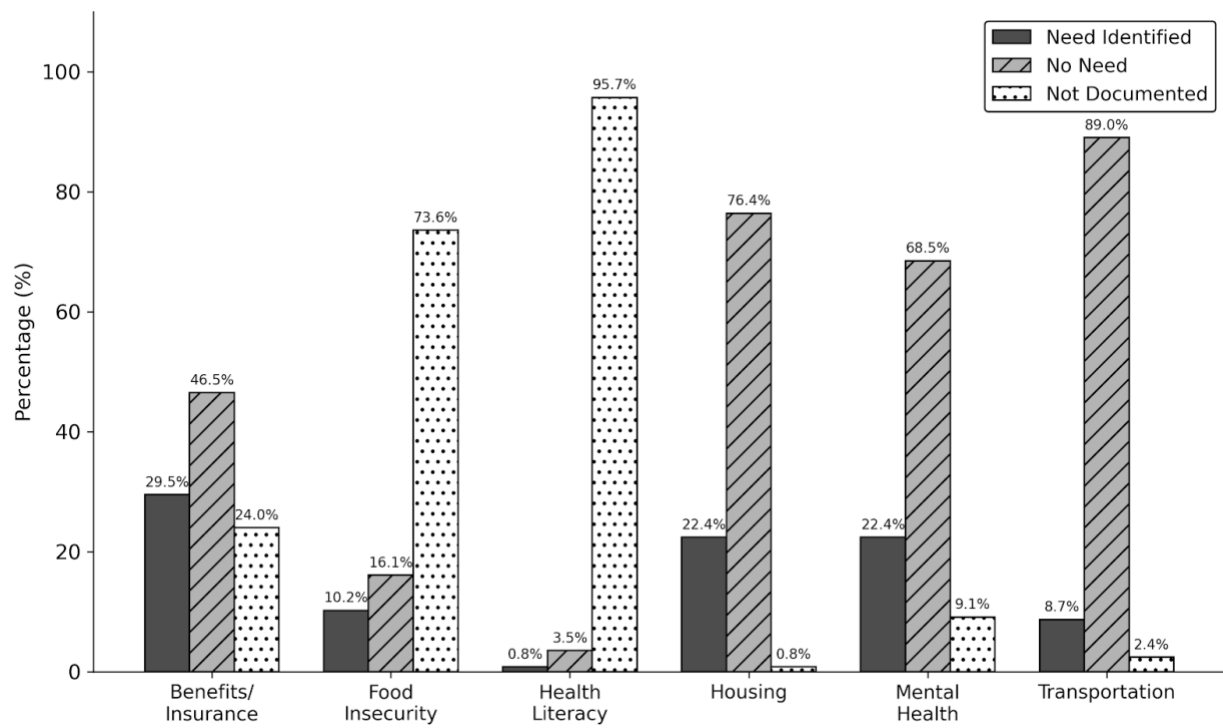

Supplement: Supplementary file 1 [file d3a40d67c3a99a08b3e2c2e8.pdf]
